# Supplementary material for: A comprehensive nutritional survey of hospitalized patients: Results from nutritionDay 2016 in China
Source: PubMed Central journal article supplement (PMC5863998; doi:10.1371/journal.pone.0194312), 2018-03-22
Supplement: pone.0194312.s003.pdf [file pone.0194312.s003.pdf]

**Patients list and outcomes (all ND-patients)**

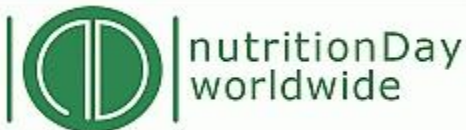

**30 days OUTCOMES**

Date  
Center-Code  
Unit-Code

| Patient Number        | Patient Initials | Discharge Date | Discharge Diagnosis    | Outcome                | Readmitted since ND    |
|-----------------------|------------------|----------------|------------------------|------------------------|------------------------|
| ...or patient sticker |                  |                | (see box 1. for codes) | (see box 2. for codes) | (see box 3. for codes) |
|                       |                  |                |                        |                        |                        |
|                       |                  |                |                        |                        |                        |
|                       |                  |                |                        |                        |                        |
|                       |                  |                |                        |                        |                        |
|                       |                  |                |                        |                        |                        |
|                       |                  |                |                        |                        |                        |
|                       |                  |                |                        |                        |                        |
|                       |                  |                |                        |                        |                        |
|                       |                  |                |                        |                        |                        |

| 1. Either use full ICD-10 codes or the codes below                                                                                                                                                                                                                                                                                                                |                                                                                                                                                                                                                                                                                                                                                                                                                                                                                                                               | 2. Outcome Code                                                                                                                                                        |
|-------------------------------------------------------------------------------------------------------------------------------------------------------------------------------------------------------------------------------------------------------------------------------------------------------------------------------------------------------------------|-------------------------------------------------------------------------------------------------------------------------------------------------------------------------------------------------------------------------------------------------------------------------------------------------------------------------------------------------------------------------------------------------------------------------------------------------------------------------------------------------------------------------------|------------------------------------------------------------------------------------------------------------------------------------------------------------------------|
| Enter up to 6 codes, in the same order as in your records                                                                                                                                                                                                                                                                                                         |                                                                                                                                                                                                                                                                                                                                                                                                                                                                                                                               | 1= Still in the hospital<br>2= Transferred to another hospital<br>3= Transferred to long term care<br>4= Rehabilitation<br>5= Discharged home<br>6= Death<br>7= Others |
| 0100 Infectious and parasitic diseases<br>0200 Neoplasms<br>0300 Blood and blood forming organs and the immune mechanism<br>0400 Endocrine, nutritional and metabolic diseases<br>0500 Mental health<br>0600 Nervous system<br>0700 Eye and adnexa<br>0800 Ear and mastoid process<br>0900 Circulatory system<br>1000 Respiratory system<br>1100 Digestive system | 1200 Skin and subcutaneous tissue<br>1300 Musculoskeletal system and connective tissue<br>1400 Genitourinary system<br>1500 Pregnancy, childbirth and the puerperium<br>1600 Conditions originating in the perinatal period<br>1700 Congenital/chromosomal abnormalities<br>1800 Symptoms, signs, abnormal clinical/lab findings<br>1900 Injury, poisoning<br>2000 External causes of morbidity and mortality (e.g. transport accidents, assaults)<br>2100 Factors influencing health status and contact with health services |                                                                                                                                                                        |
|                                                                                                                                                                                                                                                                                                                                                                   |                                                                                                                                                                                                                                                                                                                                                                                                                                                                                                                               | 3. Readmission Code                                                                                                                                                    |
|                                                                                                                                                                                                                                                                                                                                                                   |                                                                                                                                                                                                                                                                                                                                                                                                                                                                                                                               | 1= No<br>2= Yes, same hospital planned<br>3= Yes, same hospital unplanned<br>4= Yes, different hospital planned<br>5= Yes, different hospital unplanned<br>6= Unknown  |

**THANK YOU!**
